# Supplementary material for: High-Rate One-Dimensional α-MnO2 Anode for Lithium-Ion Batteries: Impact of Polymorphic and Crystallographic Features on Lithium Storage
Source: MDPI journal article supplement (doi:10.3390/nano13202808), 2023-10-23
Supplement: s1 [file s1]

## *Supplementary Materials*

# **High-Rate One-Dimensional $\alpha$ -MnO<sub>2</sub> Anode for Lithium-Ion Batteries: Impact of Polymorphic and Crystallographic Features on Lithium Storage**

Hye-min Kim <sup>1</sup>, Byung-chul Cha <sup>2,\*</sup> and Dae-wook Kim <sup>2,\*</sup>

<sup>1</sup> Department of Materials Chemistry, Shinshu University, 4-17-1, Wakasato, Nagano 3808553, Japan; hmkim545@gmail.com

<sup>2</sup> Advanced Manufacturing Process R&D Group, Ulsan Division, Korea Institute of Industrial Technology (KITECH), 55, Jongga-ro, Jung-gu, Ulsan 44313, Republic of Korea

\* Correspondence: bccha76@kitech.re.kr (B.-c.C.); dwkim@kitech.re.kr (D.-w.K.)

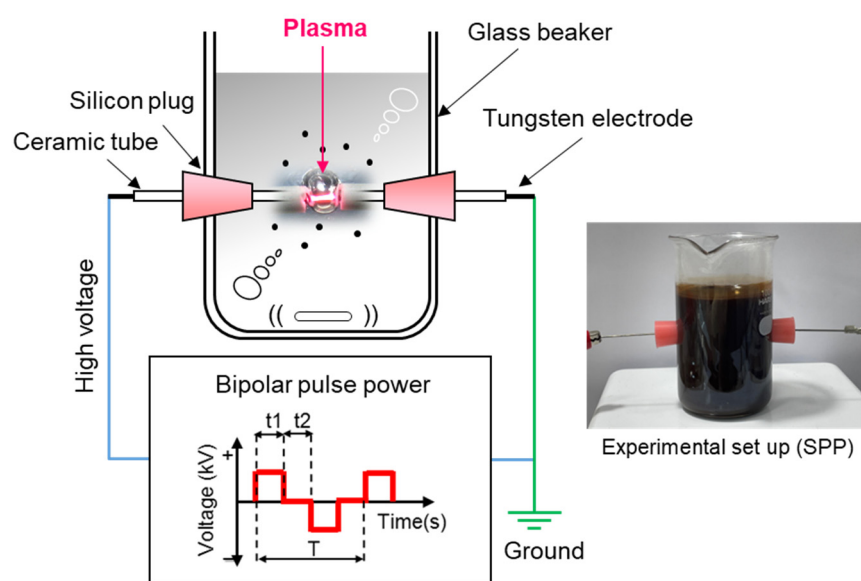

**Figure S1** Experimental set-up of solution plasma process (SPP)

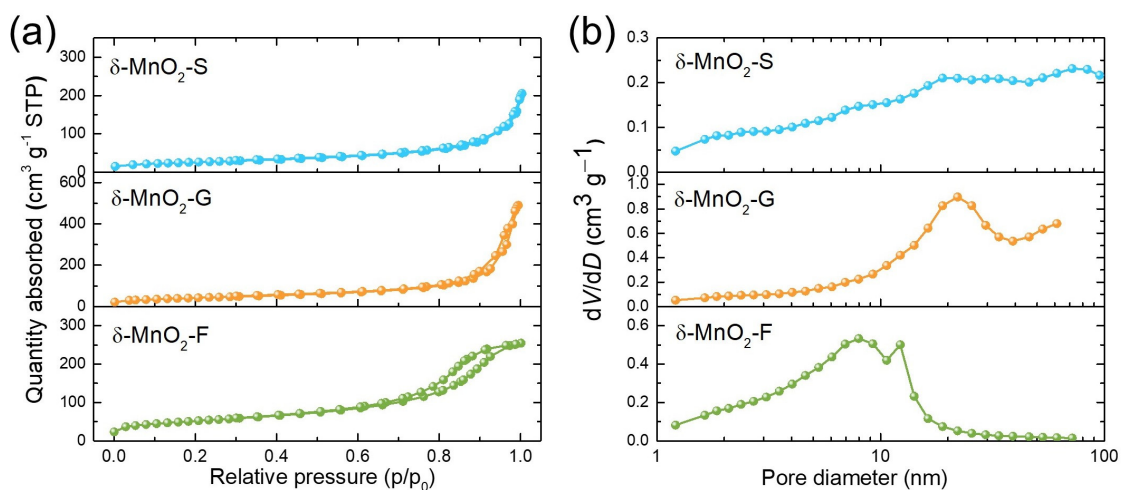

**Figure S2** (a) Specific surface area and (b) pore size distribution of  $\delta$ -MnO<sub>2</sub> particles.

**Table S1** Summary of SSA, pore size and volume of  $\delta$ -MnO<sub>2</sub> particles.

| Sample                        | Specific surface area<br>(m <sup>2</sup> g <sup>-1</sup> ) | Pore volume<br>(cm <sup>3</sup> g <sup>-1</sup> ) | Avg. pore size<br>(nm) |
|-------------------------------|------------------------------------------------------------|---------------------------------------------------|------------------------|
| $\delta$ -MnO <sub>2</sub> -S | 83.8                                                       | 0.31                                              | 14.4                   |
| $\delta$ -MnO <sub>2</sub> -G | 139.4                                                      | 0.75                                              | 20.9                   |
| $\delta$ -MnO <sub>2</sub> -F | 165.9                                                      | 0.38                                              | 9.0                    |

**Table S2.** Galvanostatic discharge/charge capacity for initial and second cycle for  $\delta$ -MnO<sub>2</sub> electrodes.

|               |           | Specific discharge capacity (mAh g <sup>-1</sup> ) |                               |                               |
|---------------|-----------|----------------------------------------------------|-------------------------------|-------------------------------|
|               |           | $\delta$ -MnO <sub>2</sub> -S                      | $\delta$ -MnO <sub>2</sub> -G | $\delta$ -MnO <sub>2</sub> -F |
| Initial cycle | Dch.      | 1689                                               | 2050                          | 1856                          |
|               | Char.     | 1090                                               | 1160                          | 556                           |
|               | I.C.E (%) | 64.5                                               | 56.6                          | 30.0                          |
| Second cycle  | Dch.      | 1131                                               | 1214                          | 611                           |
|               | Char.     | 1044                                               | 1089                          | 517                           |
|               | C.E (%)   | 92.3                                               | 89.7                          | 84.6                          |

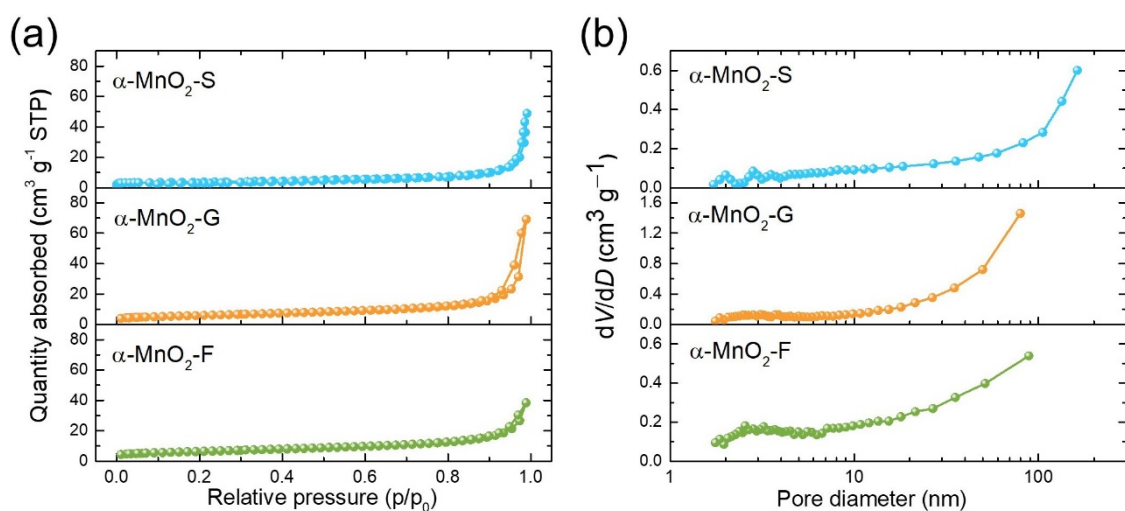

**Figure S3** (a) Specific surface area and (b) pore size distribution of  $\alpha$ -MnO<sub>2</sub> particles.

**Table S3** Summary of SSA, pore size and volume of  $\alpha$ -MnO<sub>2</sub> particles.

| Sample                        | Specific surface area<br>(m <sup>2</sup> g <sup>-1</sup> ) | Pore volume<br>(cm <sup>3</sup> g <sup>-1</sup> ) | Avg. pore size<br>(nm) |
|-------------------------------|------------------------------------------------------------|---------------------------------------------------|------------------------|
| $\alpha$ -MnO <sub>2</sub> -S | 21.3                                                       | 0.18                                              | 33.1                   |
| $\alpha$ -MnO <sub>2</sub> -G | 20.6                                                       | 0.11                                              | 20.8                   |
| $\alpha$ -MnO <sub>2</sub> -F | 21.7                                                       | 0.06                                              | 10.9                   |

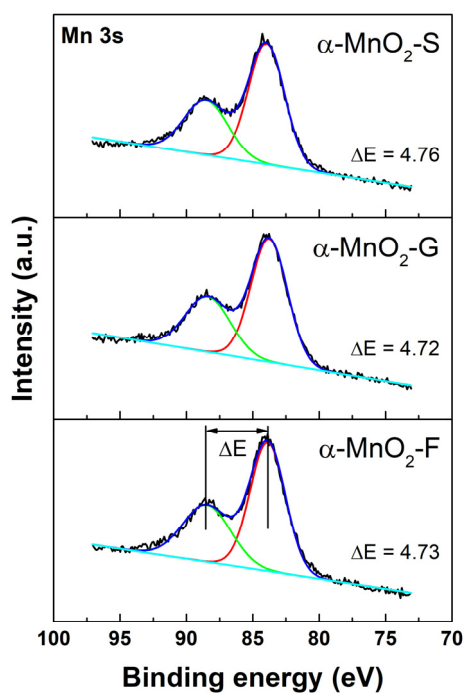

**Figure S4** XPS spectrum of Mn 3s for  $\alpha$ -MnO<sub>2</sub>-S,  $\alpha$ -MnO<sub>2</sub>-G and  $\alpha$ -MnO<sub>2</sub>-F

**Table S4.** Galvanostatic discharge/charge capacity for initial, second and third cycle for  $\alpha$ -MnO<sub>2</sub> electrodes.

|               |           | Specific discharge capacity (mAh g <sup>-1</sup> ) |                               |                               |
|---------------|-----------|----------------------------------------------------|-------------------------------|-------------------------------|
|               |           | $\alpha$ -MnO <sub>2</sub> -S                      | $\alpha$ -MnO <sub>2</sub> -G | $\alpha$ -MnO <sub>2</sub> -F |
| Initial cycle | Dch.      | 1744                                               | 1654                          | 1626                          |
|               | Char.     | 1260                                               | 1004                          | 680                           |
|               | I.C.E (%) | 72.2                                               | 60.7                          | 41.8                          |
| Second cycle  | Dch.      | 1287                                               | 1026                          | 709                           |
|               | Char.     | 1251                                               | 997                           | 638                           |
|               | C.E (%)   | 97.2                                               | 97.2                          | 90.0                          |
| Third cycle   | Dch.      | 1294                                               | 1027                          | 664                           |
|               | Char.     | 1248                                               | 989                           | 612                           |
|               | C.E (%)   | 96.4                                               | 96.3                          | 92.2                          |

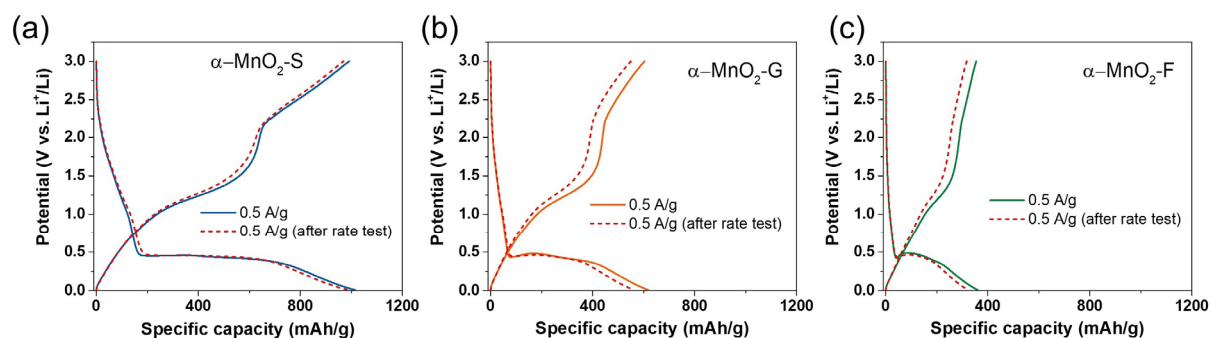

**Figure S5** Comparison of galvanostatic discharge-charge curves for initial (solid line) and after rate test (dashed line) at current density of  $0.5 \text{ A g}^{-1}$  of (a)  $\alpha\text{-MnO}_2\text{-S}$ , (b)  $\alpha\text{-MnO}_2\text{-G}$  and (c)  $\alpha\text{-MnO}_2\text{-F}$ .

**Table S5** Specific discharge capacity in third cycle of  $\alpha\text{-MnO}_2$  electrodes at various current density.

| Current Density<br>( $\text{A g}^{-1}$ ) | Specific discharge capacity ( $\text{mAh g}^{-1}$ ) |                                |                                | Rate capability % (relative retention)<br>(Rate/0.1 C) |                                |                                |
|------------------------------------------|-----------------------------------------------------|--------------------------------|--------------------------------|--------------------------------------------------------|--------------------------------|--------------------------------|
|                                          | $\alpha\text{-MnO}_2\text{-S}$                      | $\alpha\text{-MnO}_2\text{-G}$ | $\alpha\text{-MnO}_2\text{-F}$ | $\alpha\text{-MnO}_2\text{-S}$                         | $\alpha\text{-MnO}_2\text{-G}$ | $\alpha\text{-MnO}_2\text{-F}$ |
| 0.1                                      | 1294                                                | 1027                           | 664                            | 100                                                    | 100                            | 100                            |
| 0.2                                      | 1186                                                | 828                            | 476                            | 91.7                                                   | 80.6                           | 71.7                           |
| 0.5                                      | 1014                                                | 618                            | 361                            | 78.4                                                   | 60.2                           | 54.4                           |
| 1                                        | 845                                                 | 470                            | 283                            | 65.3                                                   | 45.8                           | 42.6                           |
| 2                                        | 673                                                 | 353                            | 215                            | 52.0                                                   | 34.4                           | 32.4                           |
| 0.5                                      | 987                                                 | 556                            | 321                            | 76.3                                                   | 54.1                           | 48.3                           |

**Table S6.** Summary of impedance parameters: Ohmic ( $R_s$ ), charge transfer ( $R_{ct}$ ) and Warburg coefficient ( $\sigma$ ) of  $\alpha$ -MnO<sub>2</sub> electrodes.

|                               | $R_s$ (ohm) | $R_{ct}$ (ohm) | $\sigma$ ( $\Omega \text{ s}^{-1/2}$ ) |
|-------------------------------|-------------|----------------|----------------------------------------|
| $\alpha$ -MnO <sub>2</sub> -S | 1.8         | 32.5           | 7.3                                    |
| $\alpha$ -MnO <sub>2</sub> -G | 2.0         | 46.3           | 10.2                                   |
| $\alpha$ -MnO <sub>2</sub> -F | 1.6         | 49.5           | 15.8                                   |

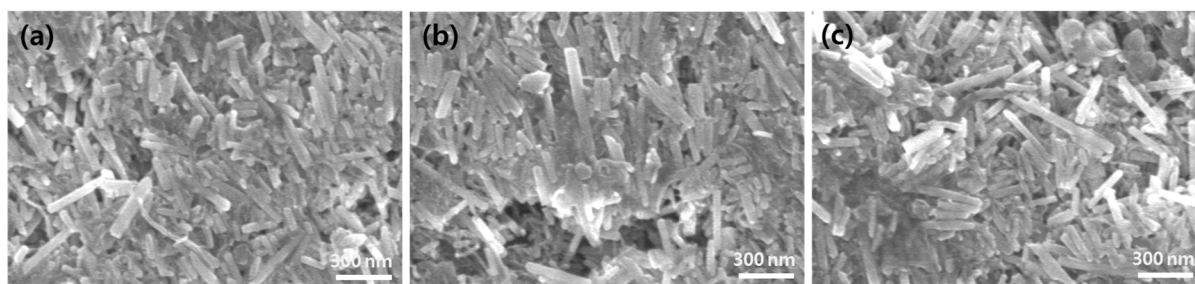

**Figure S6** FE-SEM images of cycled electrodes for (a)  $\alpha$ -MnO<sub>2</sub>-S, (b)  $\alpha$ -MnO<sub>2</sub>-G and (c)  $\alpha$ -MnO<sub>2</sub>-F.



**Table S7.** Summary of cyclability and rate performance of MnO<sub>x</sub> and carbon composites anodes for LIBs

| Electrode materials                                                 | Rate performance<br>(mAh g <sup>-1</sup> ) | Ref.      |
|---------------------------------------------------------------------|--------------------------------------------|-----------|
| <b>MnO<sub>2</sub>/3D-rGO</b>                                       | 380 (1 A/g)                                | Ref 1     |
| <b>δ-MnO<sub>2</sub> nanoscrolls/RGO</b>                            | 226 (1A/g)                                 | Ref 2     |
| <b>Nanostructured MnO<sub>2</sub></b>                               | 464 (2 A/g)                                | Ref 3     |
| <b>MnO<sub>2</sub>-3D Porous</b>                                    | 433 (1.6 A/g)                              | Ref 4     |
| <b>MCM-MnO<sub>2</sub></b>                                          | 65 (2.4 A/g)                               | Ref 5     |
| <b>MnO<sub>2</sub>/VACNTs (vertically aligned carbon nanotubes)</b> | 414 (2 A/g)                                | Ref 6     |
| <b>NiCo<sub>2</sub>O<sub>4</sub>@MnO<sub>2</sub></b>                | 398 (1.6 A/g)                              | Ref 7     |
| <b>MnO<sub>2</sub>@HCN (Hollow carbon nanosphere)</b>               | 150 (2 A/g)                                | Ref 8     |
| <b>Mn<sub>2</sub>O<sub>3</sub></b>                                  | 528.4 (2 A/g)                              | Ref 9     |
| <b>α-MnO<sub>2</sub>/graphene</b>                                   | 340 (2 A/g)                                | Ref 10    |
| <b>MnO<sub>x</sub>@C</b>                                            | 670 (2A/g)                                 | Ref 11    |
| <b>δ-MnO<sub>2</sub>/C</b>                                          | 212 (1.5 A/g)                              | Ref 12    |
| <b>SnO<sub>2</sub>@MnO<sub>2</sub>@graphite nanosheet</b>           | 621.6 (2 A/g)                              | Ref 13    |
| <b>MnO<sub>2</sub>-polypyrrole nanorods</b>                         | 475 (2 A/g)                                | Ref 14    |
| <b>MnO<sub>2</sub> nanosheets</b>                                   | 576 (2 A/g)                                | Ref 15    |
| <b>Fe<sub>3</sub>O<sub>4</sub>@C@MnO<sub>2</sub></b>                | 445 (2 A/g)                                | Ref 16    |
| <b>Mn<sub>3</sub>O<sub>4</sub>/NHC (N-doped honeycomb carbon)</b>   | 472 (2 A/g)                                | Ref 17    |
| <b>MnO<sub>2</sub> nanorods</b>                                     | 498.2 (1 A/g)                              | Ref 18    |
| <b>MnO<sub>2</sub>@Fe<sub>2</sub>O<sub>3</sub> composite</b>        | 583.1 (1.6 A/g)                            | Ref 19    |
| <b>α-MnO<sub>2</sub>-S</b>                                          | <b>673 (2 A/g)</b>                         | This work |
| <b>α-MnO<sub>2</sub>-G</b>                                          | <b>353 (2 A/g)</b>                         | This work |
| <b>α-MnO<sub>2</sub>-F</b>                                          | <b>215 (2 A/g)</b>                         | This work |

## Reference

- [1] H. Liu, Z. Hu, Y. Su, H. Ruan, R. Hu, L. Zhang, *Appl. Surf. Sci.*, 2017, 392, 777-784.
- [2] H. Liu, Z. Hu, L. Tian, Y. Su, H. Ruan, L. Zhang, R. Hu, *Ceram. Int.*, 2016, 42, 13519-13524.
- [3] L. Zhang, J. Song, Y. Liu, X. Yuan, S. Guo, *J. Power Sources*, 2018, 379, 68-73.
- [4] Y. Li, Q. Zhang, J. Zhu, X.-L. Wei, P.K. Shen, *J. Mater. Chem. A*, 2014, 2, 3163-3168.
- [5] P.M. Ette, K. Selvakumar, S.M.S. Kumar, K. Ramesha, *Electrochim. Acta*, 2018, 292, 532-539.
- [6] A. Abdollahi, A. Abnavi, F. Ghasemi, S. Ghasemi, Z. Sanaee, S. Mohajerzadeh, *Electrochim. Acta*, 2021, 390, 138826.
- [7] Z. Zhang, Y. Huang, J. Yan, C. Li, X. Chen and Y. Zhu, *Appl. Surf. Sci.*, 2019, 473, 266-274.
- [8] Z. Cao, Y. Yang, J. Qin and Z. Su, *J. Power Sources*, 2021, 491, 229577.
- [9] S. Shi, S. Deng, M. Zhang, M. Zhao, G. Yang, *Electrochim. Acta*, 2017, 224, 285-294.
- [10] H. S. Kim, D. W. Kim, S.-S. Kim, C. Senthil and H. Y. Jung, *Chem. Eng. J.*, 2022, 427, 130937.
- [11] Y. Ye, C. Zhu, X. Guo and F. Cheng, *Energy & Fuels*, 2022, 36, 5989-5997.
- [12] Y. Lin, H. Tian, J. Qian, M. Yu, T. Hu, U. Lassi, Z. Chen and Z. Wu, *Materials Today Chemistry*, 2022, 26, 101023.
- [13] W. Li, X. Deng, Y. Feng, D. Xiong and M. He, *Ceram. Int.*, 2021, 47, 33405-33412.
- [14] M. Wang, Q. Yang, T. Zhang, B. Zhu, G. Li, *FRSC Adv.*, 2016, 6, 19952-19956.
- [15] J. Zang, J. Ye, H. Qian, Y. Lin, X. Zhang, M. Zheng, Q. Dong, *Electrochim. Acta*, 2018, 260, 783-788.
- [16] Y. Wang, S. Rao, P. Mao, F. Zhang, P. Xiao, L. Peng and Q. Zhu, *Electrochim. Acta*, 2020, 337, 135739.
- [17] D. Zhang, C. Zhang, X. Zheng, Y. Zhao, X. Shi, B. Luo, Y. Li, G. Liu, X. Liu and C. Yu, *International Journal of Minerals, Metallurgy and Materials*, 2023, 30, 1152-1161.
- [18] J. Chen, Y. Wang, X. He, S. Xu, M. Fang, X. Zhao, Y. Shang, *Electrochim. Acta*, 2014, 142, 152-156.
- [19] C. Liu, X. Zhang, H. Shang, S. Li, Z. Wen, S. Ji and J. Sun, *J. Alloys Compd.*, 2021, 876, 160113.
